# Supplementary material for: Self-Sustained Chaotic Jumping of Liquid Crystal Elastomer Balloon under Steady Illumination
Source: MDPI journal article supplement (doi:10.3390/polym15244651), 2023-12-08
Supplement: s1 [file s1]

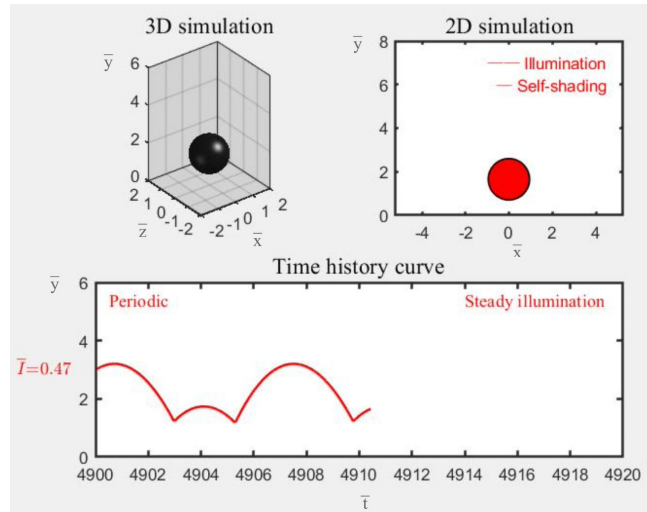

**Video S1** Periodic motion mode of the LCE balloon.

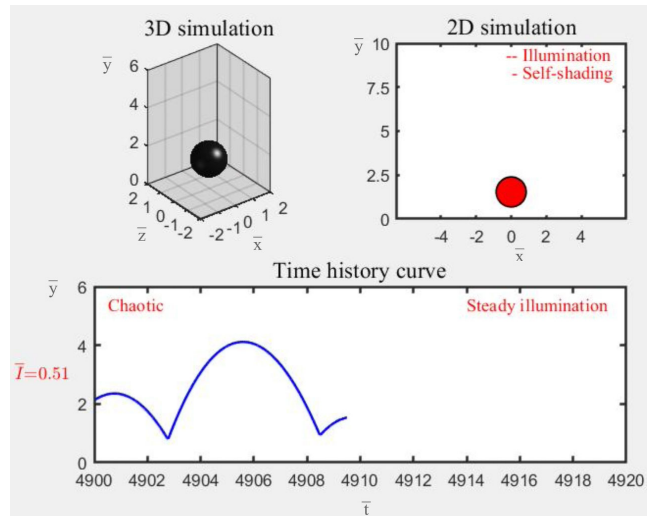

**Video S2** Chaotic motion mode of the LCE balloon.

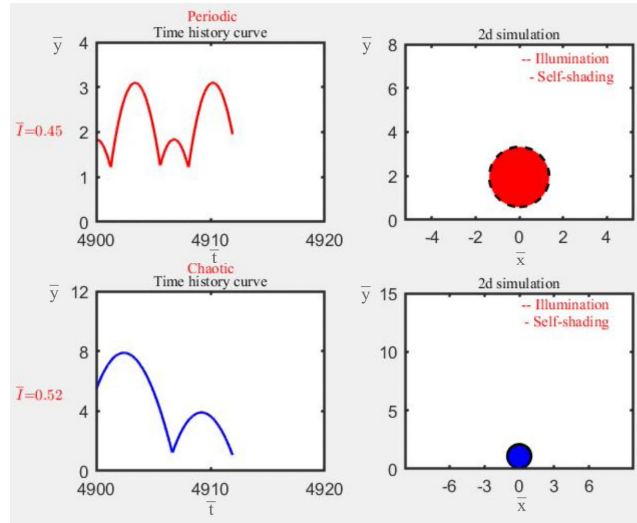

**Video S3** Effect of light intensity on the jumping mode of the LCE balloon.

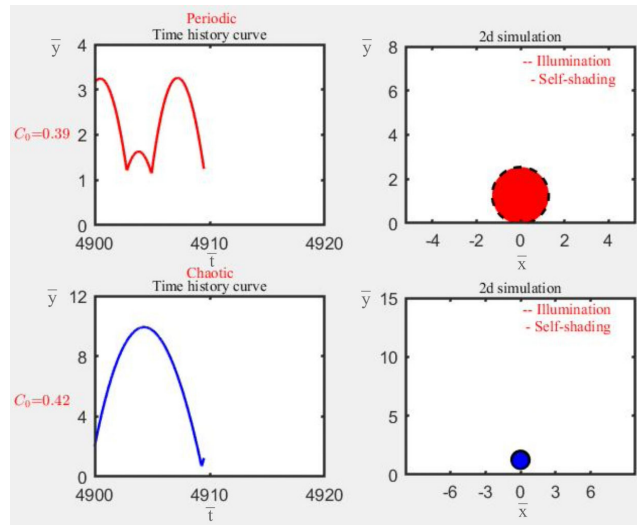

**Video S4** Effect of contraction coefficient on the jumping mode of the LCE balloon.

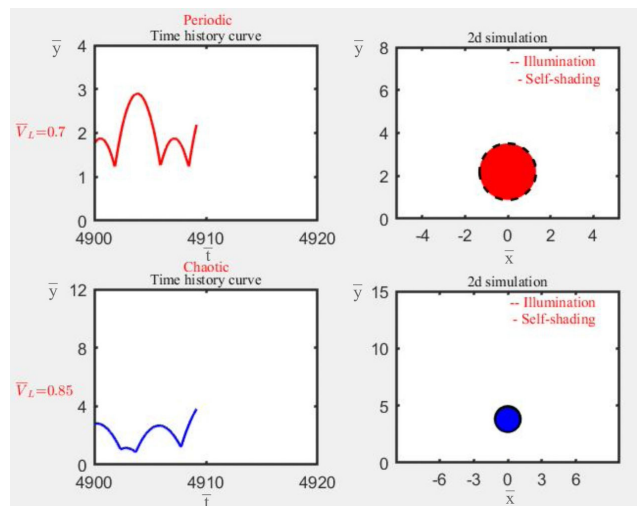

**Video S5** Effect of balloon volume on the jumping mode of the LCE balloon.

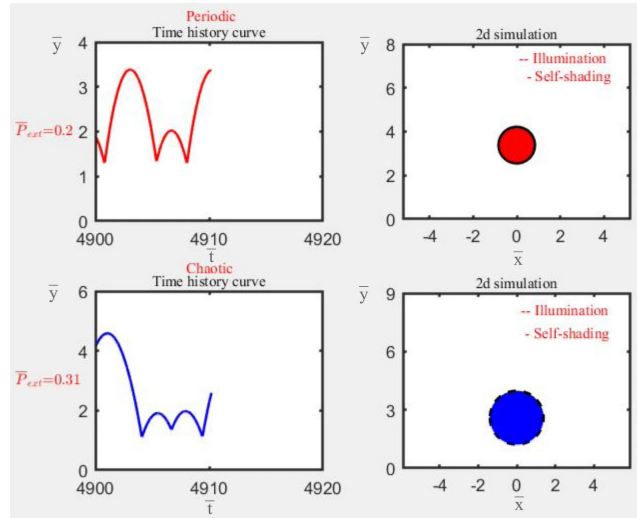

**Video S6** Effect of external pressure on the jumping mode of the LCE balloon

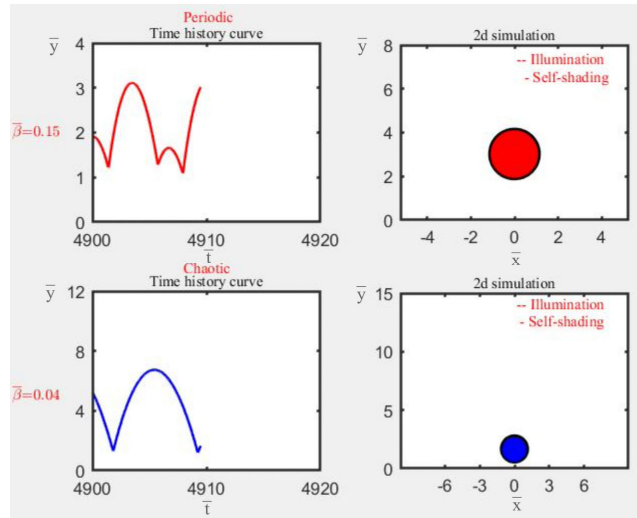

**Video S7** Effect of damping coefficient on the jumping mode of the LCE balloon.

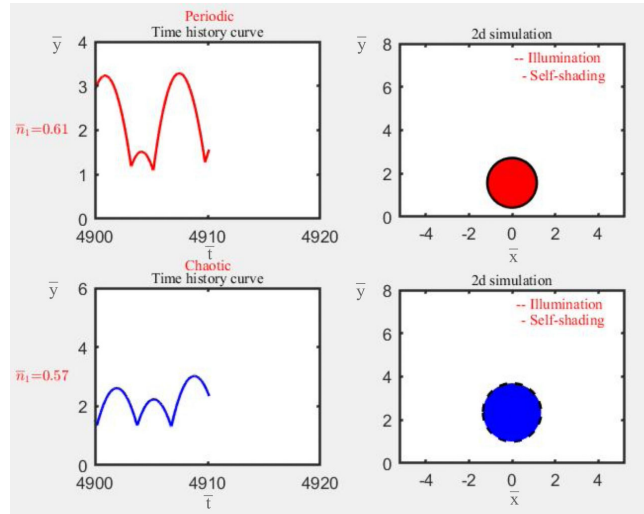

**Video S8** Effect of amount of gaseous substance on the jumping mode of the LCE balloon.

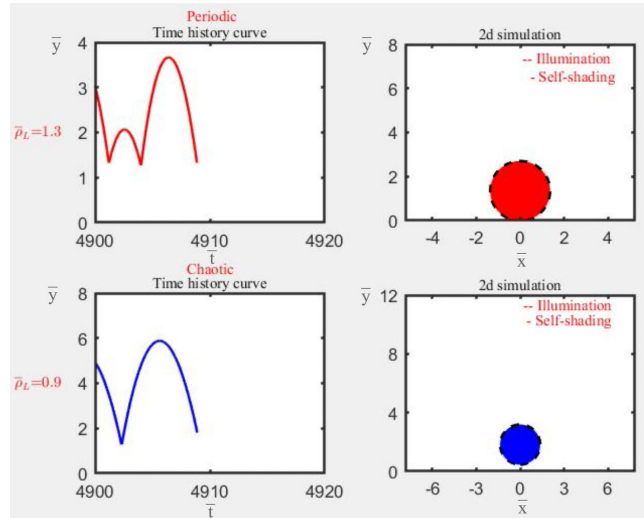

**Video S9** Effect of LCE mass density on the jumping mode of the LCE balloon.

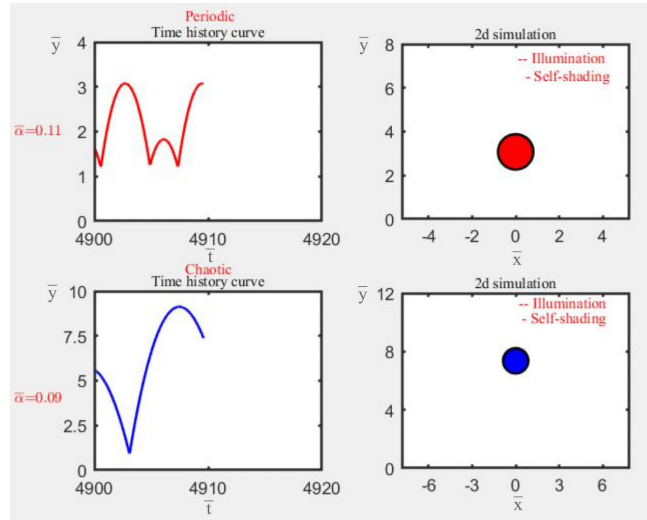

**Video S10** Effect of beating damping coefficient on the jumping mode of the LCE balloon.

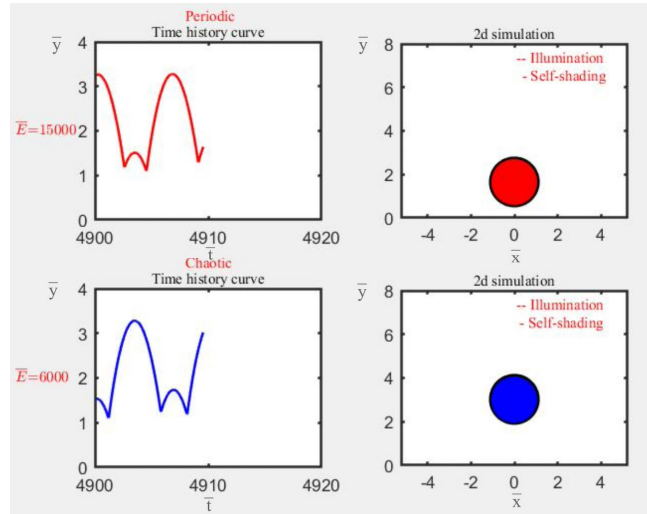

**Video S11** Effect of elastic modulus on the jumping mode of the LCE balloon.

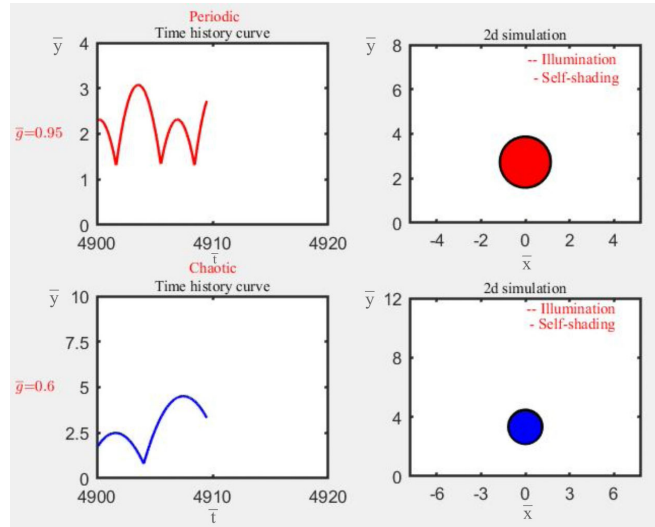

**Video S12** Effect of gravitational acceleration on the jumping mode of the LCE balloon.

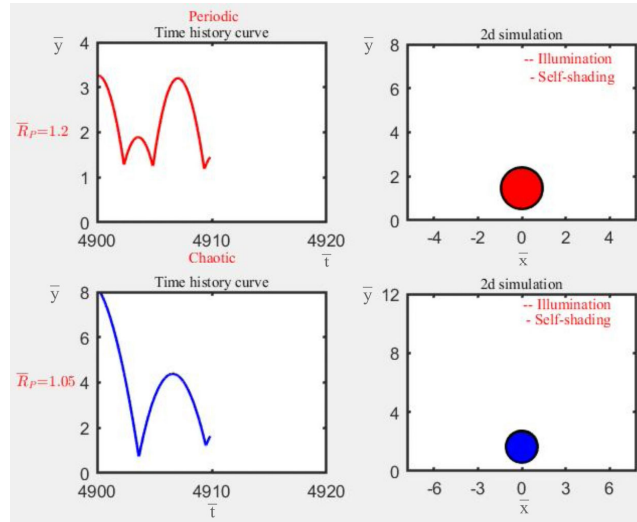

**Video S13** Effect of painting radius on the jumping mode of the LCE balloon.
